# Supplementary material for: Genome-Wide Identification and Characterization of the Abiotic-Stress-Responsive GRF Gene Family in Diploid Woodland Strawberry (Fragaria vesca)
Source: MDPI journal article supplement (doi:10.3390/plants10091916), 2021-09-15
Supplement: s1 [file s1]

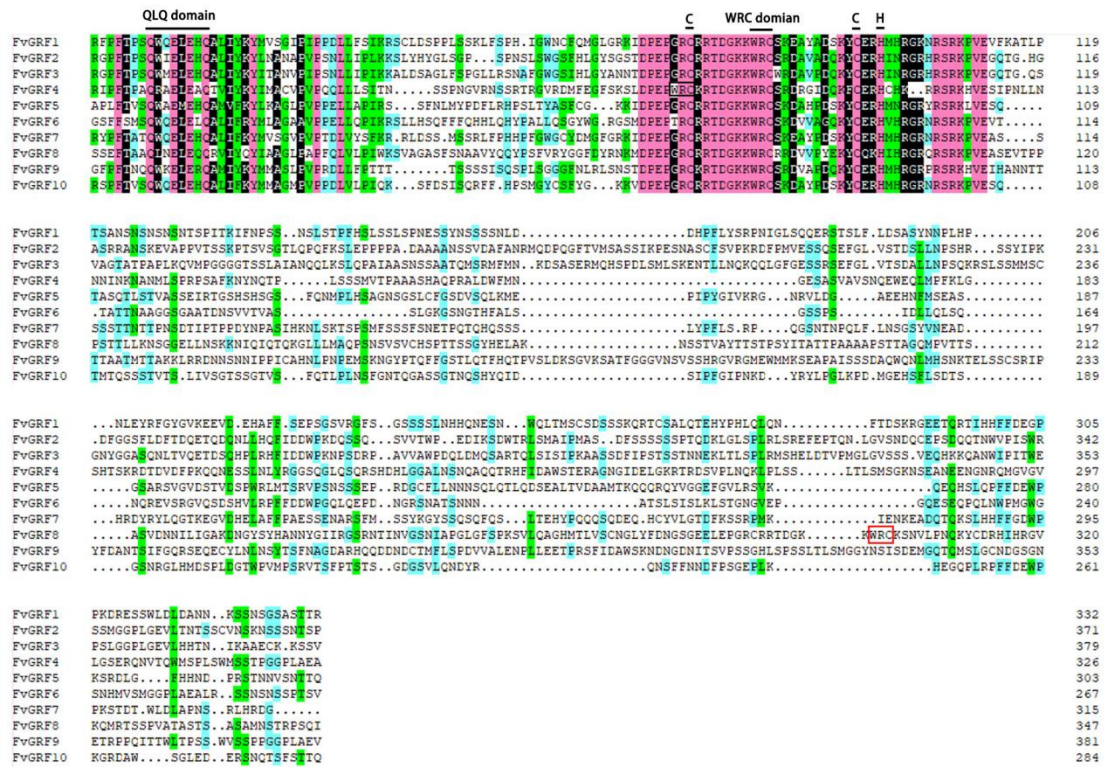

**Figure S1.** Sequence alignment of FvGRF (*Fragaria vesca* GRF) proteins and the QLQ and WRC domains are indicated upside. Identical amino acids are indicated by the color background.

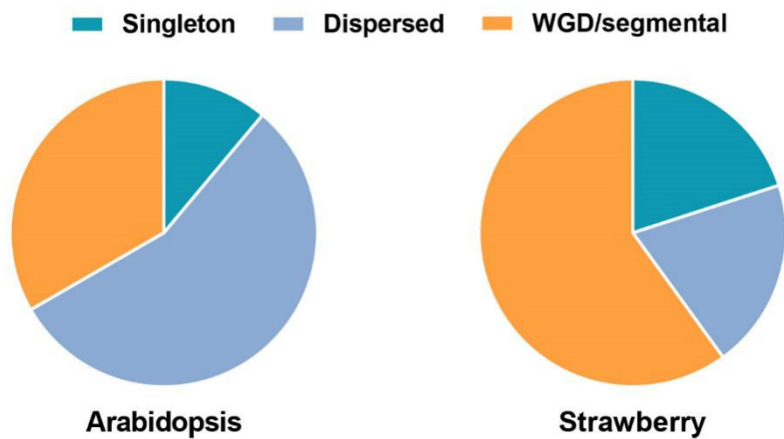

**Figure S2.** Relative frequency of different modes of gene duplication in *Arabidopsis thaliana* and woodland strawberry. Different colors represent different types of gene duplication.
